# Supplementary material
Source: publisher site journal article supplement (https://www.dovepress.com/article/254104)
Supplement: Supplementary file 1 [file get_supplementary_file.php]

**Supplementary materials**

**Table S1:** Characteristics of the included studies between Jan 1, 2015 - up to Jan 6, 2020 (part I)

| Author/Reference/Country/  Year/Type of study | Aim/period/  No & type of studies included/ | Findings | Limitations/  future directions |
| --- | --- | --- | --- |
| Maddocks et al3  UK/2017/  Review with systematic approach | - describes the profile of patients with advanced COPD,  - summarises the benefits of PC interventions,  - consider models of integrated palliative care (ICP) in COPD with evaluation in high-income countries.  Period: Jan 1st, 1980-June 20th, 2017 | - modern approaches to palliative care, which are needs-based more than prognosis-based,  - indications for PC and potential models of integrative working with PC for COPD patients,  - supporting evidence for the management of symptoms and concerns in COPD patients,  - structure and components of ICP and respiratory services for patients with breathlessness. | - model evaluation of PC in high income countries,  - future randomised trails and population-based cohort studies are needed to evaluate the cost-effectiveness and  safety of the proposed models. |
| Clari et al4  Italy/2018/  Systematic Review of Qualitative Findings | - to identify, evaluate, and summarise the qualitative research regarding the unmet needs of COPD patients.  Period: January 1995 - May 2017.  - 8 articles included in the qualitative review. | The 3 main domains of unmet needs of COPD patients are:  (1) unmet needs  regarding information about the disease,  (2) unmet physical, emotional, and social needs,  (3) unmet care needs. | The need  to create care interventions that meet the authentic needs of people with COPD.  - Further studies, with qualitative and quantitative  approaches on larger samples of patients should evaluate to unmet needs of people  with COPD. |
| Smith et al5  UK/2017/  Systematic review | - to investigate known prognostic variables and scores that predict death within 12 months in stable COPD patients (not hospitalized).  Period: up to December 30th, 2015 and updated on May 1st, 2016.  - 10 studies included in the qualitative analysis. | No single variable or multivariable score can currently be recommended for prediction of mortality at or less than 12 months.  The B-AE-D index was developed. | Because the analysed studies included selected populations it is difficult to generalize any conclusions to COPD population.  - Future use of large datasets to develop and validate multivariable tools for use in practice. |

**Table S1:** Characteristics of the included studies between Jan 1, 2015 - up to Jan 6, 2020 (part II)

| Author/Reference/Country/  Year/Type of study | Aim/period/  No & type of studies included/ | Findings | Limitations/  future directions |
| --- | --- | --- | --- |
| Almagro et al17  Spain/2017/  Systematic review with a validation cohort | - to assess the reliability of current literature suggested recommendations for initiating PC based on a foreseeable poor prognosis in the short or medium term (1-year mortality) in COPD patients hospitalized for exacerbation,  - to validate the utility of the pro­posed variables in a cohort of 697 patients hospitalized for COPD exacerbation.  Period: 2006-2017.  - 24 articles: 4 systematic reviews; 11 revision articles; 7 COPD guidelines; 2 guides of non-oncological PC. | None of the literature sug­gested criteria for initiating PC based on an expected poor vital prognosis in COPD patients in the short or medium term offers enough reliability;  - 10 variables or multicomponent indices were selected in correlation with poor prognosis in hospitalised COPD patients.  Dyspnea and depression in patients hospitalized for COPD, with impact on quality of life can be improved by PC integrated alongside the pharmacological, non-pharmacological and psychological therapies. | Results are limited to hospitalized patients and should be analysed in COPD outpatients.  - predictive mortality variables have limitations,  - the gender difference where not evaluated in the cohort study,  - only articles with data extracted on 1-year mortality were included. |
| Siouta et al18  Belgium/2016/  Systematic literature review | - to assess European guidelines/ pathways for integrated PC in COPD patients with advanced COPD.  Period: January 1st, 1995-December 31st, 2013.  - 19 articles (17 guidelines and 2 pathways).  The level of integration of the PC content of the included studies was determined using a widely used tool with 11 criteria.14 | There is an increasing awareness for the importance of integrated PC in patients with advanced COPD. | - standardized strategies to early integrate PC in COPD patients are needed,  - improvement in communication skills on PC, including end-of life issues with patients and their caregivers. |
| Vermylen et al15  USA/2015/  Review | - reviews what is known about palliative care and COPD  Period: up to 2015. | In patients with refractory symptoms proactive palliative care must be early included in the management of the disease, covering complex needs related with the disease. | Further research is needed to assess the multidimensional benefits of proactive palliative care in COPD. |

**Table S1:** Characteristics of the included studies between Jan 1, 2015 - up to Jan 6, 2020 (part III)

| Author/Reference/Country/  Year/Type of study | Aim/period/  No & type of studies included/ | Findings | Limitations/  future directions |
| --- | --- | --- | --- |
| Harrington et al16  USA/2017/  Review | - to evaluate the role and place of palliative care in COPD management, with focus on the optimal integration of PC in daily practice.  Period: up to 2017. | Difficulty in prognostication, communications issues, lack of access to PC services are important barriers in providing integrated palliative care in COPD patients. | The new ideal model of early integrated palliative care into standard practice require validation across different populations and settings. |
| Parry et al19  South Wales/2016/  Review | - part 2 of the two-part series evaluates further end-of-life prognostic indicators in COPD patients.  Period: up to 2016 | A complex review of the impact of exacerbations and the main comorbidities in COPD patients. | Accurate prognostic methods should be developed in order to address the needs of PC in COPD patients. |
| Bloom et al22  UK/2019/  Cohort study with external validation dataset | - to derive a prognostic risk model to predict mortality at 1 year based on routinely collected variables within primary care in COPD patients.  Period: 1 January 2004 - 26 June 2015.  UK largest longitudinal database of electronic healthcare records was used: 54,990 eligible COPD patients in the first cohort and 4,931 eligible COPD patients in the external validation dataset. | - the BARC index-  is based on 18 variables,  - it was external validated in a big cohort of COPD patients,  - could aid communication between primary care clinicians and patients and relatives. | - excessive number of incorporated variables (18),  - the lack of specification for the cut-off points and scores of each variable,  - limited applicability for clinicians. |
| Ekstrom M. et al23  Sweden/2015/  Review | - to critically review  recent tools used in the measurement of self-reported chronic breathlessness  in patients with severe or life-limiting disease.  Period: up to January 29, 2015. | - unidimensional tools include: the exacerbations of chronic pulmonary  disease respiratory symptom (E-RS)  and a score of shortness of breath with daily activities (SOBDA),  - multidimensional tools include: the Dyspnea-12 questionnaire and the Multidimensional  Dyspnea Profile (MDP). | An imperative need for structured measurements of self-report breathlessness in COPD patients across different settings and populations, both in clinical trials and real-life. |
